# Supplementary material for: Augmented expression of cardiac ankyrin repeat protein is induced by pemetrexed and a possible marker for the pemetrexed resistance in mesothelioma cells
Source: Springer Nature journal article supplement (doi:10.1186/s12935-017-0493-8), 2017-12-01

**Figure S1**

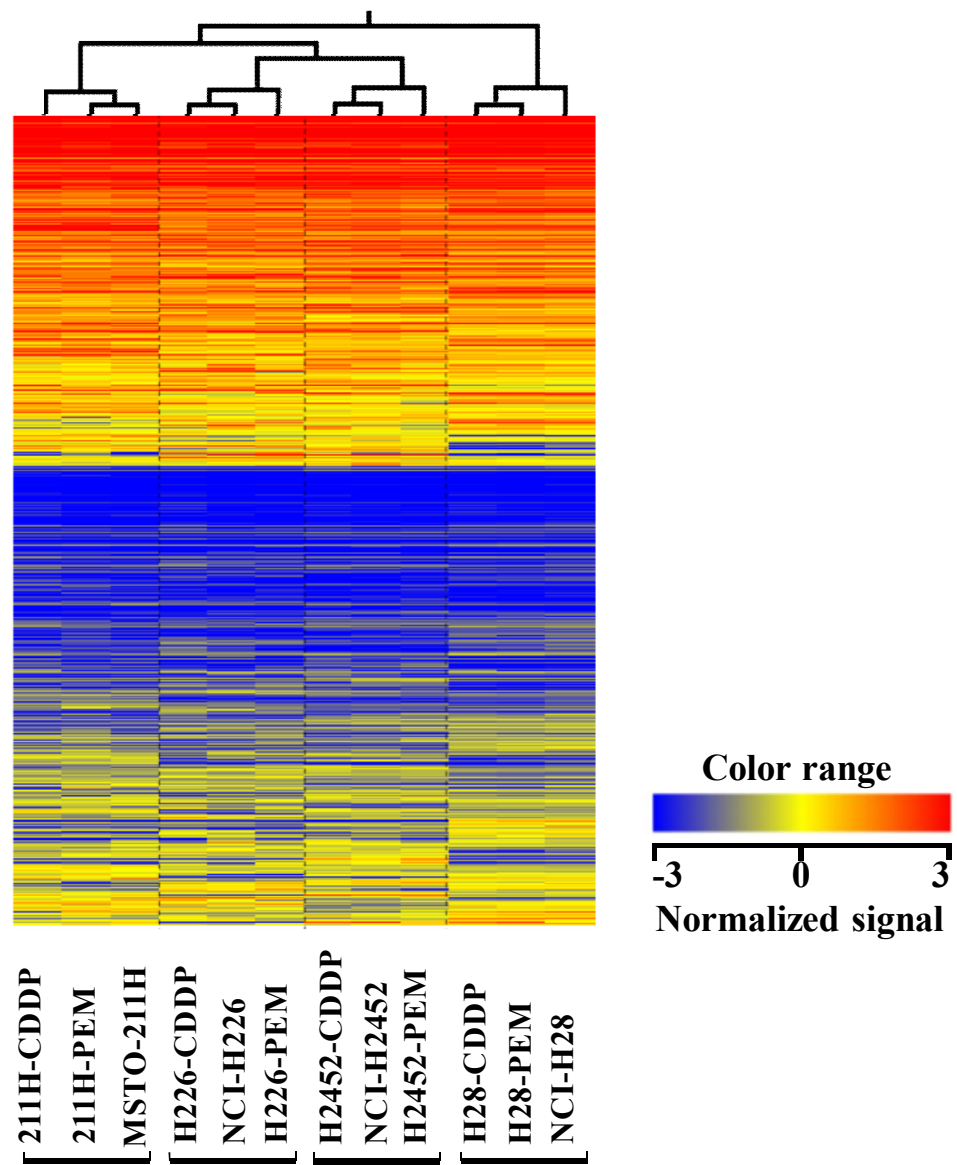

Supplement: MOESM1 [file 15296136]
